# Supplementary material
Source: Springer Nature journal article supplement (http://www.springermedizin.de/resource/supplementary/12887_2011_512_MOESM1_ESM.pdf/9475342)
Supplement: MOESM1 [file 9475342]

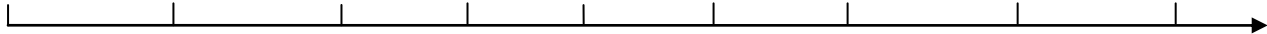

|                       |                         |                                           |                      |                      |                       |                                            |                           |                            |
|-----------------------|-------------------------|-------------------------------------------|----------------------|----------------------|-----------------------|--------------------------------------------|---------------------------|----------------------------|
| Antenatal counselling | Birth and randomisation | Day 1<br>Lab samples<br>Echo Cor<br>X-ray | Day 3<br>Lab samples | Day 7<br>Lab samples | Day 14<br>Lab samples | Day 28<br>Lab samples<br>Echo cor<br>X-ray | Lung function<br>6 months | Lung function<br>12 months |
|-----------------------|-------------------------|-------------------------------------------|----------------------|----------------------|-----------------------|--------------------------------------------|---------------------------|----------------------------|
